# Supplementary material for: The recently introduced Aedes albopictus in Tunisia has the potential to transmit chikungunya, dengue and Zika viruses
Source: PubMed Central journal article supplement (PMC7556531; doi:10.1371/journal.pntd.0008475), 2020-10-02

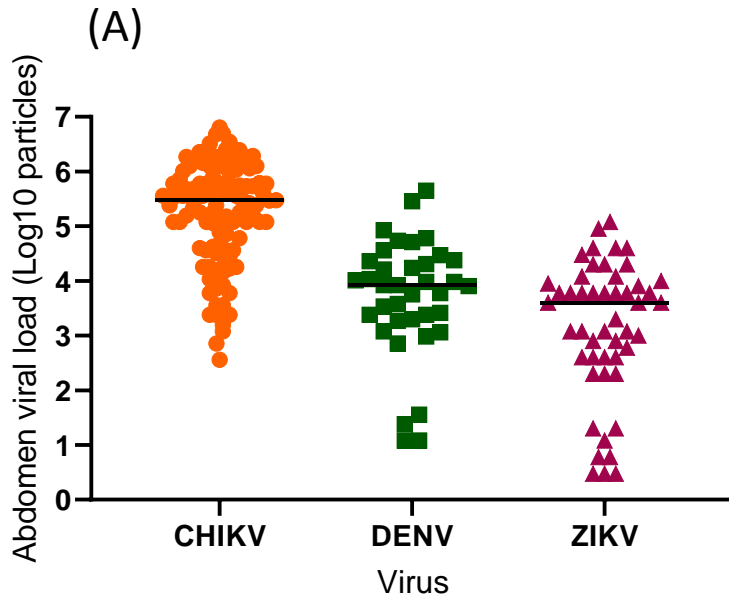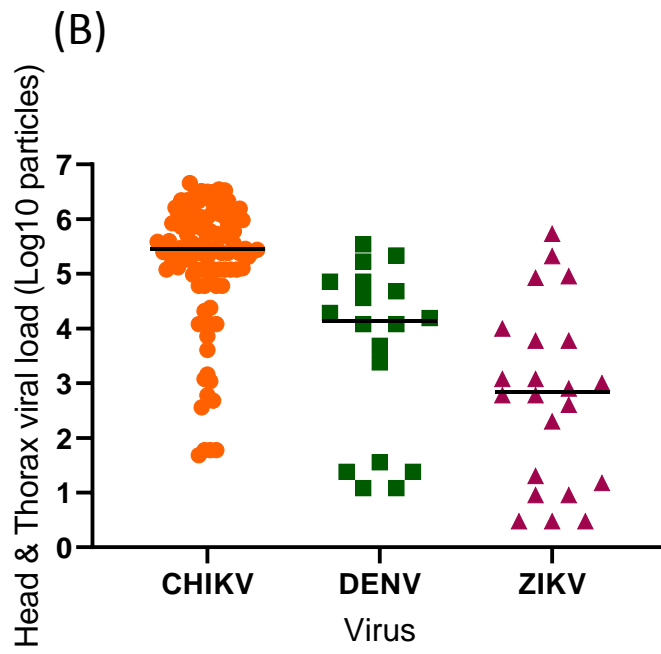

Supplement: pntd.0008475.s002.pdf [file pntd.0008475.s002.pdf]
